# Supplementary material
Source: publisher figshare collection journal article supplement (https://frontiersin.figshare.com/ndownloader/files/28947084)
Supplement: Supplementary file [file 28947084]

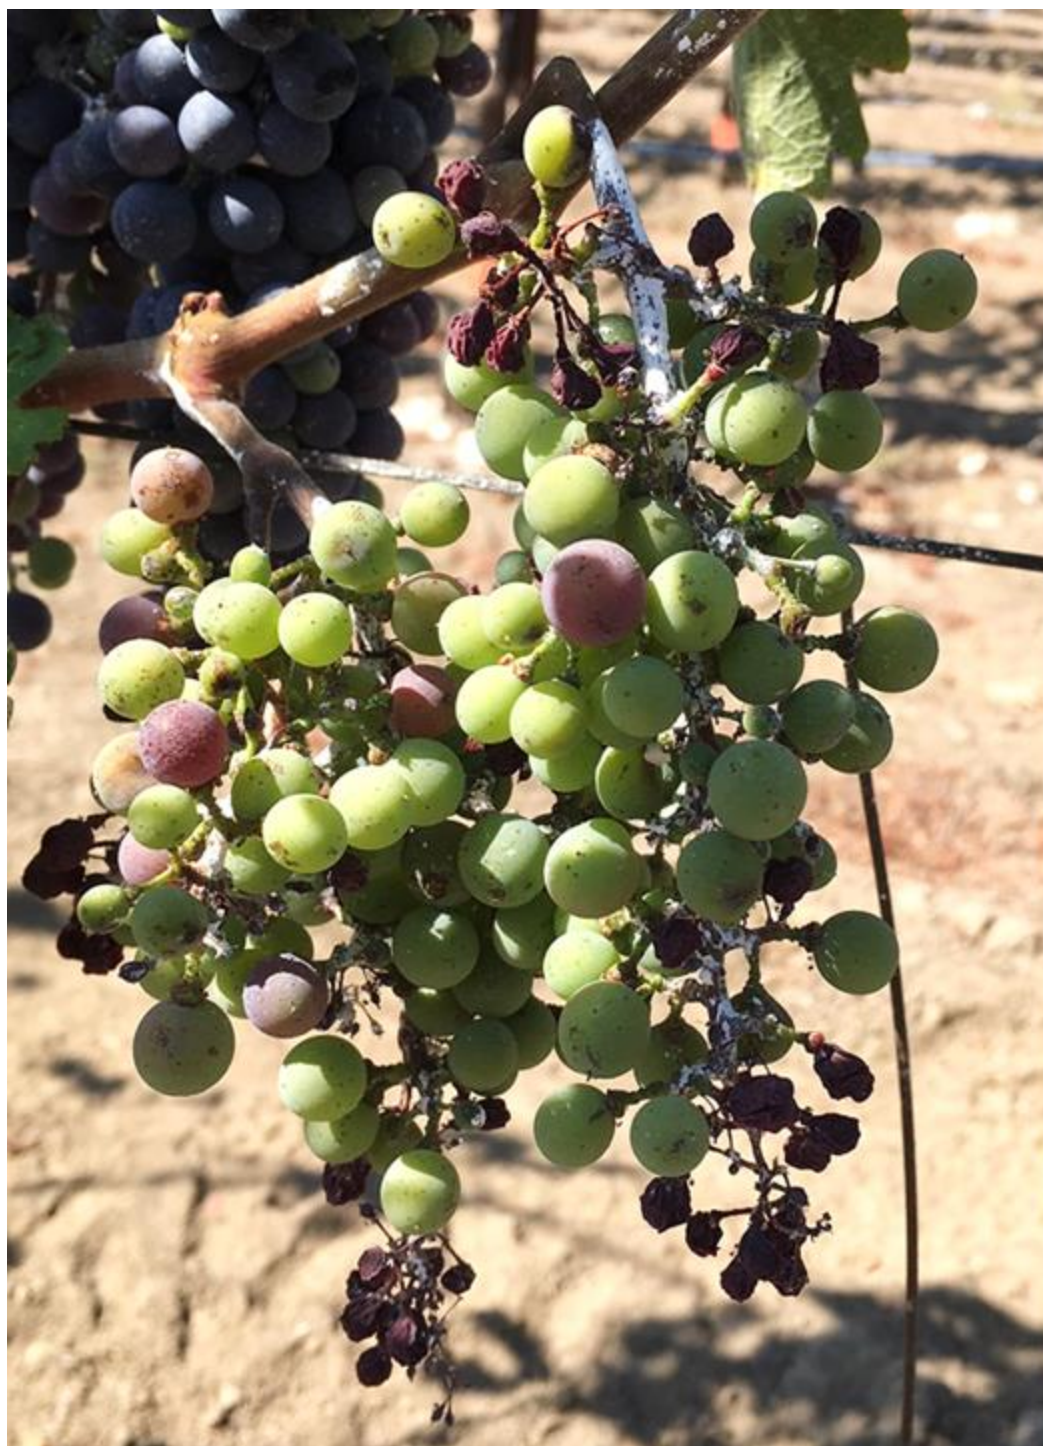

Figure S1

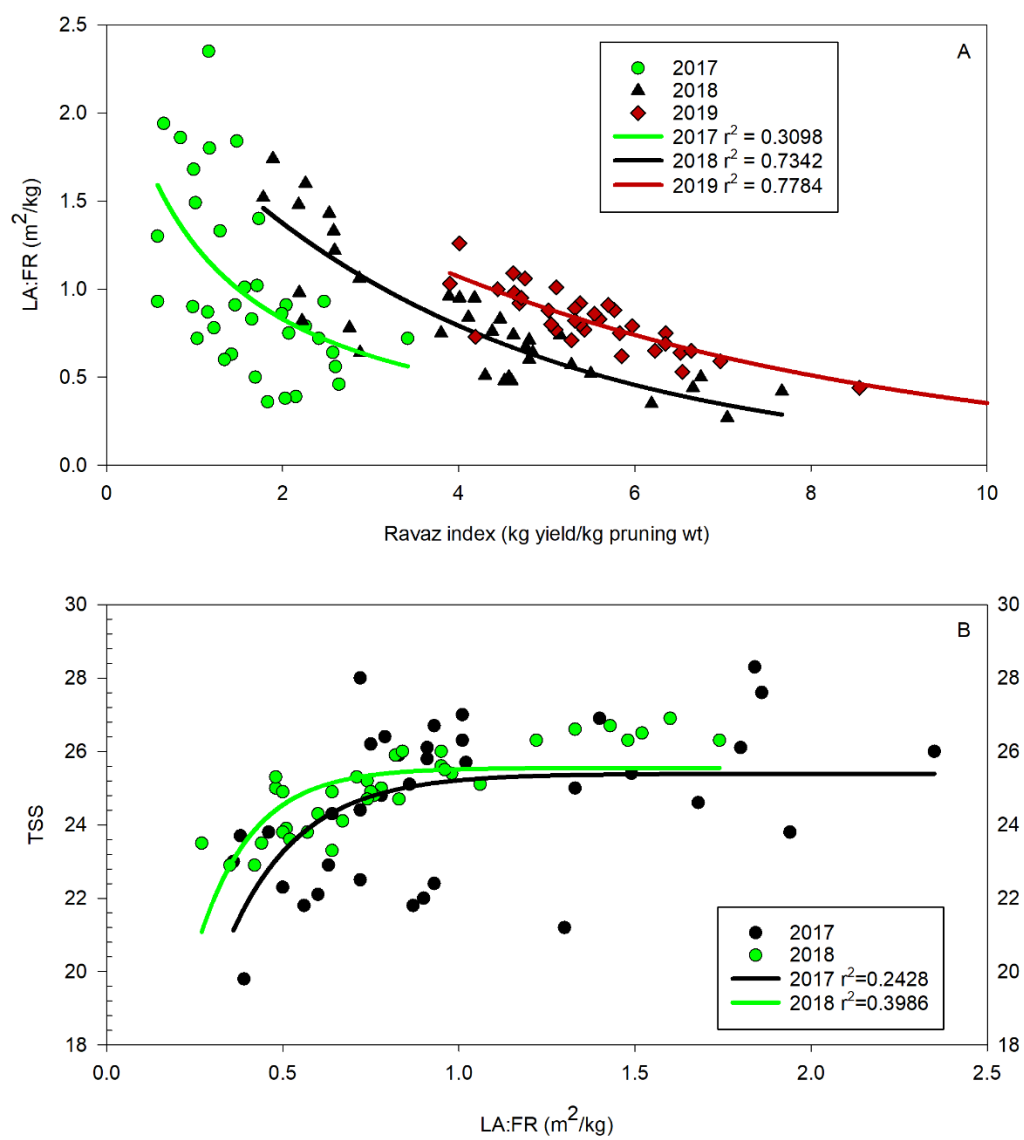

Figure S2.
